# Supplementary material for: C-di-GMP Hydrolysis by Pseudomonas aeruginosa HD-GYP Phosphodiesterases: Analysis of the Reaction Mechanism and Novel Roles for pGpG
Source: PLOS journal article supplement (doi:10.1371/journal.pone.0074920), 2013-09-16
Supplement: S2 (10.1371/journal.pone.0074920.s002) [file journal.pone.0074920.s002]

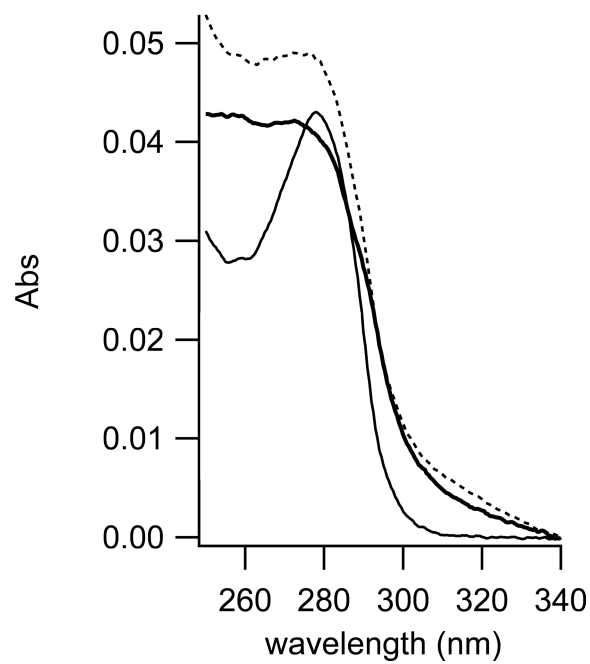

Figure S2. UV-spectra (250-340nm) of purified proteins characterized in the present study: PA4108 (bold line), PA4781 (nonphosphorylated, thin line) and PA4781<sub>HD-GYP</sub> (dotted line). The high absorption contribution below 270 nm found in PA4108 and PA4781<sub>HD-GYP</sub> spectra is due to the presence of nucleotide species bound to the proteins.
