# Supplementary material for: C-di-GMP Hydrolysis by Pseudomonas aeruginosa HD-GYP Phosphodiesterases: Analysis of the Reaction Mechanism and Novel Roles for pGpG
Source: PLOS journal article supplement (doi:10.1371/journal.pone.0074920), 2013-09-16
Supplement: S3 (10.1371/journal.pone.0074920.s003) [file journal.pone.0074920.s003]

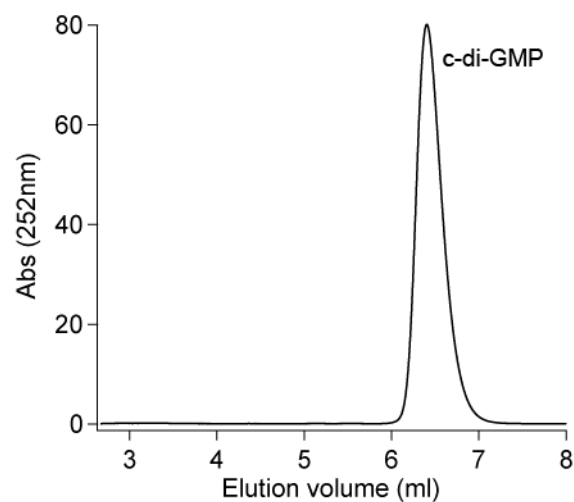

Figure S3. PA4781 catalytic assay. Reaction of 10  $\mu\text{M}$  PA4781 with 30  $\mu\text{M}$  c-di-GMP in the presence of 10 mM  $\text{MgCl}_2$  and 2.5 mM  $\text{MnCl}_2$  (4 hours, at 30°C); the nucleotide content of the reaction mixture was analyzed by RP-HPLC (bold line): no hydrolysis of c-di-GMP was observed.
