# Supplementary material for: C-di-GMP Hydrolysis by Pseudomonas aeruginosa HD-GYP Phosphodiesterases: Analysis of the Reaction Mechanism and Novel Roles for pGpG
Source: PLOS journal article supplement (doi:10.1371/journal.pone.0074920), 2013-09-16
Supplement: S5 (10.1371/journal.pone.0074920.s005) [file journal.pone.0074920.s005]

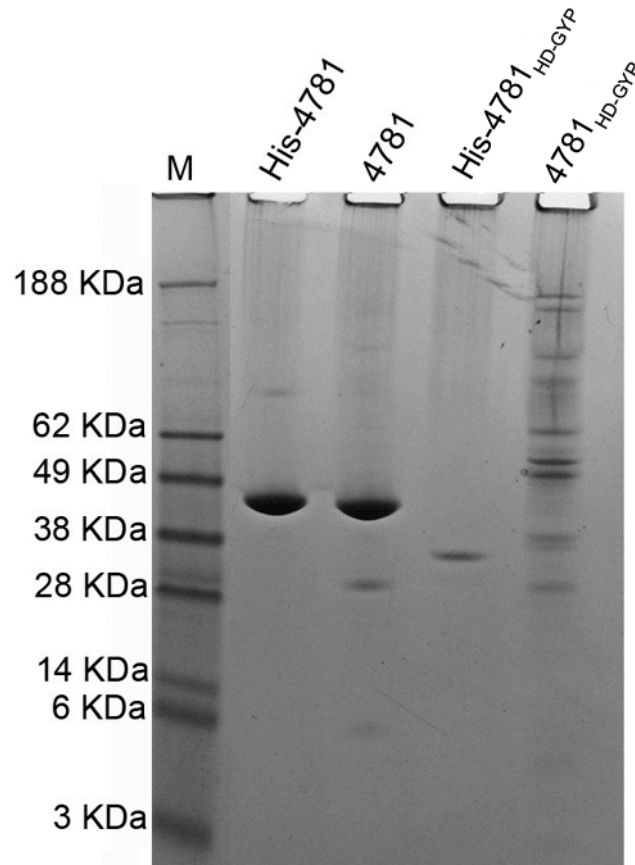

Figure S5. SDS-PAGE after proteolysis. Over-night incubation of His-tagged PA4781 with thrombin results in cleavage of the His-tag (lane 3) while the incubation of His-tagged PA4781<sub>HD-GYP</sub> (lane 4) results in protein degradation and dramatic aggregation (lane 5). His-tagged PA4781 was used as reference (lane 2). Each protein sample was incubated in 200  $\mu$ l with 3 Units of thrombin (Sigma) overnight at room temperature. Protein concentration: 88  $\mu$ M His-PA4781; 17  $\mu$ M His-PA4781<sub>HD-GYP</sub>.
